# Supplementary material for: Hybrid pectin–Fe3+/polyacrylamide double network hydrogels with excellent strength, high stiffness, superior toughness and notch-insensitivity
Source: Royal Society of Chemistry journal article supplement (doi:10.1039/c7sm02005h), 2017-01-01
Supplement: c7sm02005h1.pdf [file c7sm02005h1.pdf]

## Supporting Information

### Hybrid pectin-Fe<sup>3+</sup>/polyacrylamide double network hydrogel with excellent strength, high stiffness, superior toughness and notch-insensitivity

Rui Niu<sup>a</sup>, Zhihui Qin<sup>a</sup>, Feng Ji<sup>a</sup>, Meng Xu<sup>a</sup>, Xinlu Tian<sup>a</sup>, Junjie Li<sup>\*,b</sup>, Fanglian Yao<sup>\*,a,c</sup>

*a) School of Chemical Engineering and Technology, Tianjin University, Tianjin 300072, China. Email: yaofanglian@tju.edu.cn.*

*b) Department of Advanced Interdisciplinary Studies, Institute of Basic Medical Sciences and Tissue Engineering Research Center, Academy of Military Medical Science, Beijing 100850, China. Email: li41308@aliyun.com.*

*c) Key Laboratory of Systems Bioengineering of Ministry of Education, Tianjin University, Tianjin, 300072, China.*

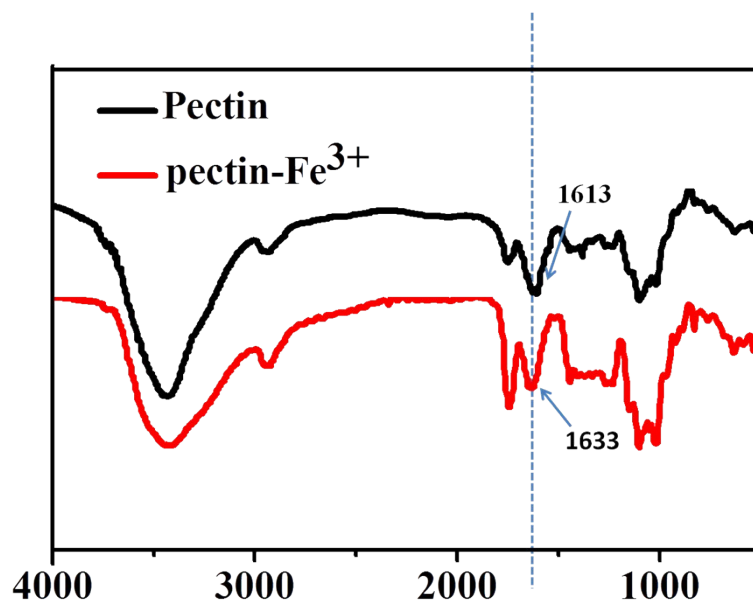

Fig. S1. FTIR spectra of pectin powder and pectin-Fe<sup>3+</sup> hydrogel.

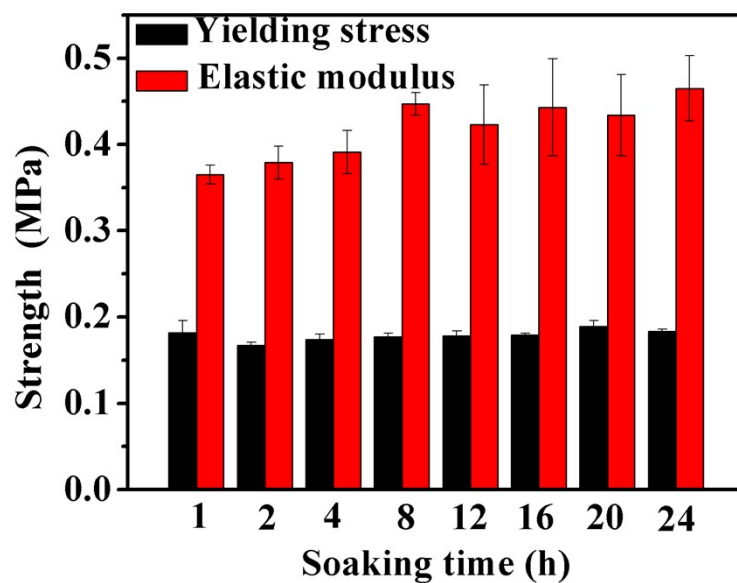

**Fig. S2.** Yielding stress and Elastic modulus of pectin-Fe<sup>3+</sup>/PAAm DN gels as a function of soaking time. The weight ratio of pectin to acrylamide is 1:7.3.

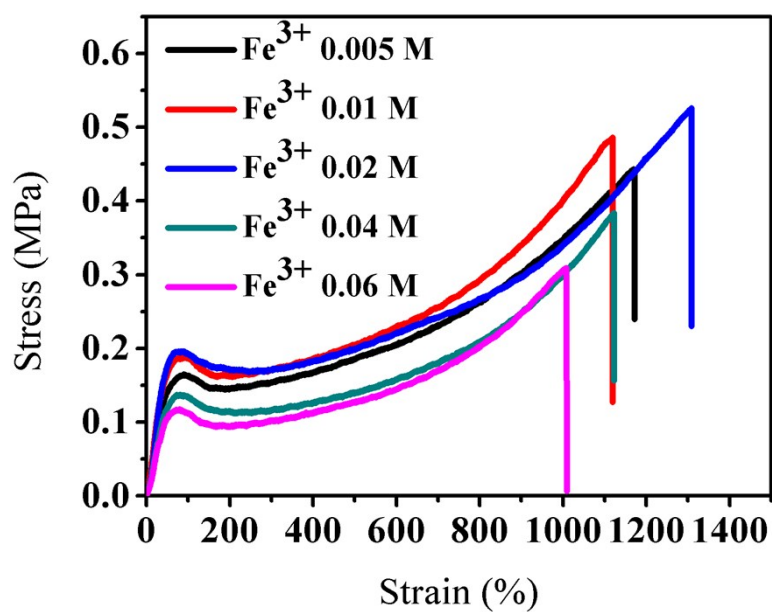

**Fig. S3.** Effect of Fe<sup>3+</sup> concentration on the tensile properties of pectin-Fe<sup>3+</sup>/PAAm DN hydrogels. The weight ratio of pectin to acrylamide is 1:7.3.

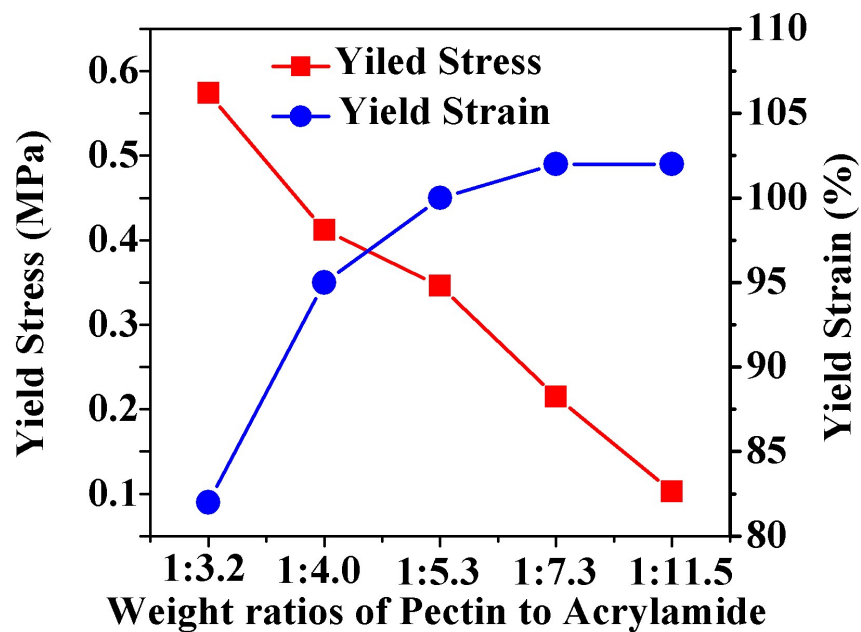

Fig. S4. Effect of weight ratios of pectin to acrylamide on the yield stress and strain of pectin-Fe<sup>3+</sup>/PAAm DN hydrogels.

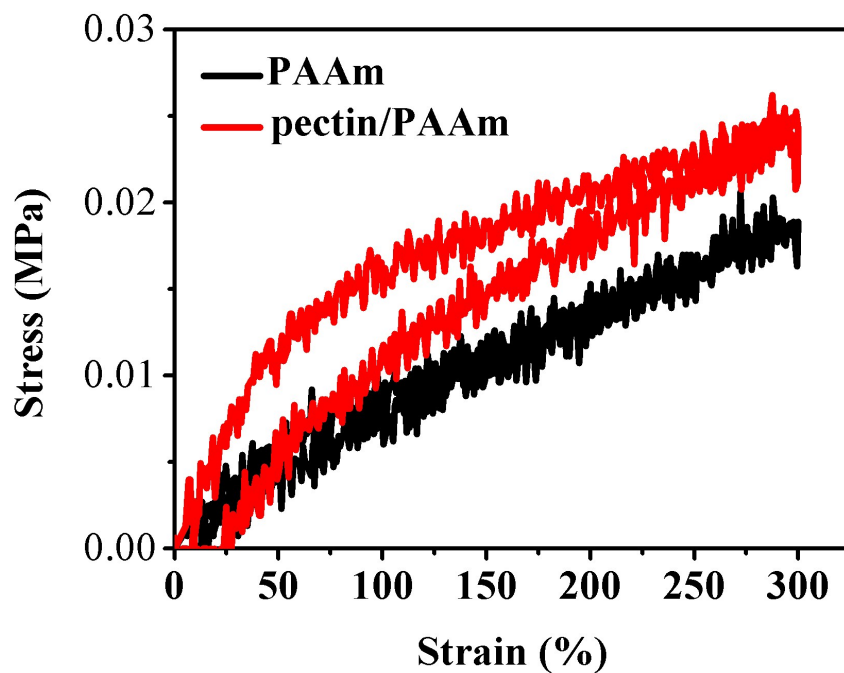

Fig. S5. The amplified loading-unloading curves of PAAm SN hydrogels and pectin/PAAm hydrogels in Fig. 7c
